# Supplementary material
Source: publisher figshare collection journal article supplement (https://gsapubs.figshare.com/articles/dataset/_/23152586)
Supplement: Supplementary file 1 [file 1]

Liu, X., Zhao, Y., Liu, J., Cui, J., Chu, Z., and Zhang, Y., 2023, Isotopic behavior and age interpretations of U-Pb, Sm-Nd, and  $^{40}\text{Ar}/^{39}\text{Ar}$  systems in polymetamorphic granulite terranes: A case study from the Prydz Belt and adjacent Vestfold Block, East Antarctica: GSA Bulletin, <https://doi.org/10.1130/B36789.1>.

## Supplemental Material

**Table S1.** SHRIMP U-Pb zircon analyses of mafic granulites from the southwestern Vestfold Hills.

**Table S2.** LA-ICP-MS U-Pb zircon analyses of rocks from the Prydz Belt.

**Table S3.** LA-ICP-MS rare earth element analyses (ppm) of zircon from rocks in the Prydz Belt.

**Table S4.** LA-ICP-MS rare earth element analyses (ppm) of garnet from rocks in the Prydz Belt.

**Table S5.** Sm-Nd isotopic compositions of minerals and whole rocks from the Prydz Belt and the Vestfold Block.

**Table S6.**  $^{40}\text{Ar}/^{39}\text{Ar}$  analyses of hornblendes and biotites in rocks from the Prydz Belt and the Vestfold Block.
